# INFOGRAPHICS IN ANESTHESIOLOGY

Complex Information for Anesthesiologists Presented Quickly and Clearly

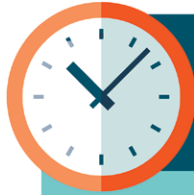

## Time for a New Monitor? Urine Oxygenation Is Associated with Acute Kidney Injury

In this issue, Silverton *et al.*<sup>1</sup> describe a novel device that monitors oxygen partial pressure in urine ( $\text{PuO}_2$ ).  $\text{PuO}_2$  independently correlated with acute kidney injury (AKI) in 86 nonoliguric cardiac surgery patients studied, and crucially is available in real time.

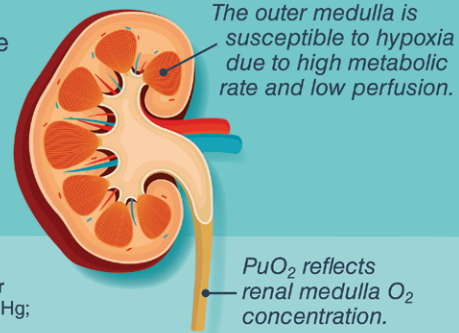

### Surgery Timeline

#### CPB

There was no difference during CPB, but patients who developed AKI had lower post-CPB  $\text{PuO}_2$  (mean difference, 6 mmHg; 95% CI, 0 to 11;  $P = 0.038$ ).

#### Post-CPB

Other real-time monitors include urine output monitoring, which is not informative for AKI, and TEE-measured renal resistive index, which is not fully characterized.<sup>2</sup>

#### 6 h Postop

Biomarkers such as urine IL-18, urine NGAL and serum NGAL, are released at the time of renal tubular injury. While they correlate with AKI, they peak 6 h after surgery.<sup>3</sup>

Urine TIMP-2 and IGFBP7 are also associated with AKI, having a bimodal distribution that has one peak intraop and another at 6 h.<sup>4</sup>

#### 12 h Postop

Urine KIM-1 rises between 12 and 24 h postop and is also associated with AKI.<sup>5</sup>

#### Day 2 Postop

In patients with AKI in Silverton *et al.*'s study, serum creatinine was not elevated until postop day 2.

KDIGO allows for perioperative AKI to be detected for up to 7 days based on urine output and serum creatinine.

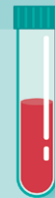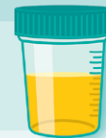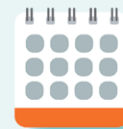

Multicenter studies are needed to validate  $\text{PuO}_2$ , and interventional studies are needed that can demonstrate clinical value in  $\text{PuO}_2$  monitoring.

CPB, cardiopulmonary bypass; IGFBP7, insulin-like growth factor binding protein 7; IL-18, interleukin-18; KDIGO, Kidney Disease: Improving Global Outcomes; KIM-1, kidney-injury-molecule-1; NGAL, neutrophil gelatinase-associated lipocalin; TEE, transesophageal echocardiography; TIMP-2, tissue inhibitor of metalloproteinase 2.

Infographic created by Jonathan P. Wanderer, Vanderbilt University Medical Center, and James P. Rathmell, Brigham and Women's Health Care/Harvard Medical School. Illustration by Annemarie Johnson, Vivo Visuals. Address correspondence to Dr. Wanderer: jon.wanderer@vumc.org.

1. Silverton NA, Lofgren LR, Hall IE, Stoddard GJ, Melendez NP, Van Tienderen M, Shumway S, Stringer BJ, Kang W-s, Lybbert C, Kuck K: Noninvasive urine oxygen monitoring and the risk of acute kidney injury in cardiac surgery. *ANESTHESIOLOGY* 2021; 135:406–18
2. Stafford-Smith M: Could trended oxygen partial pressure in the urine be the "ST segment" kidney monitor we've been looking for? *ANESTHESIOLOGY* 2021; 135:380–1
3. Parikh CR, Coca SG, Thiessen-Philbrook H, Shlipak MG, Koyner JL, Wang Z, Edelstein CL, Devarajan P, Patel UD, Zappitelli M, Krawczeski CD, Passik CS, Swaminathan M, Garg AX, TRIBE-AKI Consortium: Postoperative biomarkers predict acute kidney injury and poor outcomes after adult cardiac surgery. *J Am Soc Nephrol* 2011; 22:1748–57
4. Cummings JJ, Shaw AD, Shi J, Lopez MG, O'Neal JB, Billings FT IV: Intraoperative prediction of cardiac surgery-associated acute kidney injury using urinary biomarkers of cell cycle arrest. *J Thorac Cardiovasc Surg* 2019; 157:1545–53.e5
5. Elmedany SM, Naga SS, Elsharkawy R, Mahrous RS, Elnaggar Al: Novel urinary biomarkers and the early detection of acute kidney injury after open cardiac surgeries. *J Crit Care* 2017; 40:171–7
